# Supplementary material for: Seasonal pigment fluctuation in diploid and polyploid Arabidopsis revealed by machine learning-based phenotyping method PlantServation
Source: Springer Nature journal article supplement (doi:10.1038/s41467-023-41260-3), 2023-09-22
Supplement: 41467_2023_41260_MOESM7_ESM.pdf [file 41467_2023_41260_MOESM7_ESM.pdf]

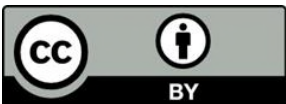

**Open Access** This file is licensed under a Creative Commons Attribution 4.0 International License, which permits use, sharing, adaptation, distribution and reproduction in any medium or format, as long as you give appropriate credit to the original author(s) and the source, provide a link to the Creative Commons license, and indicate if changes were made. In the cases where the authors are anonymous, such as is the case for the reports of anonymous peer reviewers, author attribution should be to 'Anonymous Referee' followed by a clear attribution to the source work. The images or other third party material in this file are included in the article's Creative Commons license, unless indicated otherwise in a credit line to the material. If material is not included in the article's Creative Commons license and your intended use is not permitted by statutory regulation or exceeds the permitted use, you will need to obtain permission directly from the copyright holder. To view a copy of this license, visit <http://creativecommons.org/licenses/by/4.0/>.

## Reviewers' Comments:

Reviewer #1:

Remarks to the Author:

This ms is well written and addresses a number of interesting topics: the application of machine learning to capturing plant phenotypes in relation to environmental variables, the variation in anthocyanins as a stress indicator across seasons and conditions, and the accumulation of anthocyanins in polyploids and their diploid progenitors. Each of these is a potentially important topic, and there is the potential to pull all of this information together in an impactful way. However, I do not think that the current ms completely accomplishes this goal; rather, the pieces seem somewhat separate. I could envision this as three separate papers, each valuable in its own right, but I could also envision this as a stronger paper that thoroughly integrates the parts. For example, the paper really emphasizes the machine learning aspect, with the anthocyanins and the biology that those comparisons represent as a case study. That would be fine, but it should be written as such: clearly indicate that the anthocyanin aspect is a case study. As is, the paper switches suddenly from machine learning to anthocyanins to polyploidy. Alternatively, the paper could really focus on either the anthocyanins or the polyploidy as the lead but indicate the need for imaging pipelines and then introduce the PlantServation aspect. Of course, the current approach could also be fine, but it requires more integration, as noted above.

In addition, although I think that the pipeline is well described and an important application, it is unclear that this same approach would work for others (but perhaps the details of hardware and code would allow replicability – I would hope so). And is it so much different from what many other phenotyping projects in agriculture or plant biology have used? Certainly, some of the papers in the June-July 2020 special issue of *Applications in Plant Biology*, focused on machine learning in plant biology, address similar questions and provide descriptions of phenotyping, segmentation, etc. This makes me wonder about the novelty of this specific application (although a lack of novelty does not reduce its value for the specific applications addressed here).

I also have some concerns about relating leaf color to anthocyanin content. The authors inferred anthocyanin content, related to color, by estimating content and then dividing it by leaf area. However, many factors other than leaf area could be involved in an accurate estimate of anthocyanin content, and this is especially true when content is inferred from color. For example, leaf thickness and cell number are both important when actually putting content on a per-unit basis. Dry weight or fresh weight would have been better than area; also, because anthocyanins are typically located in the cell vacuole, cell number would be a good metric, but a per-cell estimate would be much more involved (requiring a relationship between cell number and leaf volume). I am therefore a bit concerned about putting the content on a per-area basis. When relating to color, I also have some concerns. Anthocyanins exist in leaves along with many other pigments, especially chlorophyll. That means that a given anthocyanin content might appear as pink, red, or green leaves, depending on the amount of chlorophyll also present in the leaves, which could vary depending on season, stress, etc., but is unknown. The impact of variation in other pigments and cuticle is also unknown. Thus, I am not sure that anthocyanin content is actually being measured; rather, the color is recorded, but the relationship to actual content seems unclear. A better metric would be color as an indicator of stress, induced experimentally. It would also be interesting to know if the same or different compounds are being produced, both among genotypes and species and over time. This might perhaps be a more interesting question than content.

I also felt that the treatment of anthocyanins in the polyploids and diploid parents was superficial. There is a large literature on anthocyanins and other flavonoids in polyploids and their progenitors, and this is not addressed. The current paper, though, with these very approximate estimates of content, does not actually contribute much to the very interesting issues raised over the past decades about the diversity of compounds that could be produced in an allopolyploid in particular, given the combination of pathways of its parents.

In addition, I think that all data and code should be publicly available, with nothing held back to be obtained from the authors upon request.

In sum, I find all aspects of the ms interesting, but I also think that each part would require work to meet the standards of the Nature family of journals. I also think that the anthocyanin portions of the paper require much more substantial work to be useful as verifiable and solid markers of stress and/or polyploidy.

Reviewer #2:

Remarks to the Author:

This study reports on time-series planting phenotyping for detecting seasonal fluctuation in anthocyanin content in diploid and polyploid Arabidopsis. The authors detected automated hardware and software systems to collect images in the fields for this experimental study. And a large dataset was generated to cover three years and two sites in Japan and Switzerland. The time-series monitoring of anthocyanin content for the entire growing season in response to environmental changes is novel. It is important for answering biological questions. I have little knowledge about the biological processes and my concerns are mainly focused on the estimation of anthocyanin content from color information.

1.Figs. 4 & S6: the anthocyanin content (Anth) is usually expressed in  $\mu\text{g}/\text{cm}^2$  and ranges from 0 to 40. The expression in this study is inappropriate. The term relative anthocyanin content per  $\text{mm}^2$  is confusing. If it is expressed per leaf area, then it is not a relative value but an absolute value. Moreover, I suggest to use  $\text{cm}^2$  instead of  $\text{mm}^2$ , so that the digital numbers do not have to carry too many digits (E-4).

2.The data points in Fig. 4 were concentrated at the lower end and contributed more to the correlation coefficient than the points at the higher end. The  $r$  value might be a bit misleading and could not reflect the diversion of data points from the 1:1 line at the higher end. There should be a better way to measure the goodness of fit in this case. There were too many data points representing green leaves. Is it possible to build a random forest model for purple leaves specifically?

3.Line 239-240: underestimation is serious for high values ( $>0.015$ ) where the predicted values were all below the 1:1 line. This insensitivity to high Anth may cause problems for the leaves with high Anth. This may be a problem for purple leaves in the field. In the time series data of Fig. 5, the predicted values were all lower than 0.0125 for the time-series phenotyping over three years and two sites. Was this true or caused by the color saturation at high Anth values? If it was caused color saturation, the predicted Anth for purple leaves might not be convincing.

4.Fig. S14: The LOO CV accuracy is low with a  $R^2$  of 0.45. Why was the accuracy in Fig. S6 much higher? Is it hard to believe such a model could work well for the time-series phenotyping project.

5.Table S4: If the explanatory variables only included  $R+G+B$  and  $L^*+a^*+b^*$  for Anth estimation, more variables could be extracted from the RGB images. There are many studies on the extraction of color indices generated from two or three channels in the literature of remote sensing and plant phenotyping. Advanced methods for pigment estimation could be helpful for fixing the color saturation problem. This is the key to improved phenotyping for tracking the temporal variation in Anth in response to complex environmental conditions.

Reviewer #3:

Remarks to the Author:

This study highlights an inexpensive and suitable approach to phenotyping plant populations in natura; and uses it to address the consequences of hybrid allopolyploidy with an elegant design. The choice to address anthocyanin as a phenotype known to show high environmental plasticity is of great interest to address how the combination of two progenitor species in a third species interacts with environmental variation.

The study makes the best of Arabidopsis-relatives, including *A. thaliana* to validate findings as well as taxa of the polyploid complex in suitably replicated sites. The use of experimentally

resynthesized polyploids and their comparison with naturally established ones is of particular fundamental interest.

It matches papers typically published in Nature Communications, offering a detailed description of a solid amount of data and analyses that may inspire follow-up studies relying on this methodology. It also brings our understanding of polyploid systems further, and will hopefully foster further use of experimental allopolyploids in an ecological context.

I noticed only one minor issue that I was unable to solve through the rich documentation: L. 515 about the experimental production of synthetic allopolyploids "RS7 was automatically polyploidized from a hybrid...", you mean "spontaneously" (i.e. without induction by colchicine). By the way, it may be good to spell their details out (are they S0?, aso)

## 1 REVIEWER COMMENTS

2  
3 Reviewer #1 (Remarks to the Author):

4  
5 This ms is well written and addresses a number of interesting topics: the application  
6 of machine learning to capturing plant phenotypes in relation to environmental  
7 variables, the variation in anthocyanins as a stress indicator across seasons and  
8 conditions, and the accumulation of anthocyanins in polyploids and their diploid  
9 progenitors. Each of these is a potentially important topic, and there is the potential  
10 to pull all of this information together in an impactful way. However, I do not think  
11 that the current ms completely accomplishes this goal; rather, the pieces seem  
12 somewhat separate. I could envision this as three separate papers, each valuable in  
13 its own right, but I could also envision this as a stronger paper that thoroughly  
14 integrates the parts. For example, the paper really emphasizes the machine learning  
15 aspect, with the anthocyanins and the biology that those comparisons represent as a  
16 case study. That would be fine, but it should be written as such: clearly indicate that  
17 the anthocyanin aspect is a case study. As is, the paper switches suddenly from  
18 machine learning to anthocyanins to polyploidy. Alternatively, the paper could really  
19 focus on either the anthocyanins or the polyploidy as the lead but indicate the need  
20 for imaging pipelines and then introduce the PlantServation aspect. Of course, the  
21 current approach could also be fine, but it requires more integration, as noted above.

22  
23 [Thank you for your comment on the presentation of the manuscript. In the revised manuscript](#)  
24 [we formulate such that we developed PlantServation \(phenotyping method using machine](#)  
25 [learning\) and applied it to quantifying anthocyanin in diploids and polyploids as a case](#)  
26 [study \(Abstract line 45, Introduction lines 141–143\).](#)

27  
28 In addition, although I think that the pipeline is well described and an important  
29 application, it is unclear that this same approach would work for others (but perhaps  
30 the details of hardware and code would allow replicability – I would hope so). And is  
31 it so much different from what many other phenotyping projects in agriculture or  
32 plant biology have used? Certainly, some of the papers in the June-July 2020 special  
33 issue of Applications in Plant Biology, focused on machine learning in plant biology,  
34 address similar questions and provide descriptions of phenotyping, segmentation,  
35 etc. This makes me wonder about the novelty of this specific application (although a  
36 lack of novelty does not reduce its value for the specific applications addressed here).

37  
38 [We now provide the demo dataset, script, and a manual \(README\) in crest\\_demo\\_cpu.zip](#)  
39 [\(ca. 600 MB\) so that one can check the reproducibility of the pipeline. It is available as a part](#)  
40 [of Supplementary Information. It is also available as a part of a dataset deposited in Dryad,](#)  
41 [however, please note that \*\*the entire dataset \(nearly 250 GB\) will be downloaded in one go\*\*](#)  
42 [when clicking the link for Dataset 2/2 in Data availability section of the revised manuscript.](#)

43  
44 [As the reviewer points out, there have been other phenotyping methods using machine](#)  
45 [learning in plant research. The characteristic of our phenotyping method lies in the](#)

46 integration of strengths in that it is inexpensive, robust, and able to handle a large number of  
47 noisy and high-resolution images from the field by efficiently utilizing DNNs. As such, it  
48 overcomes challenges listed in the first two paragraphs of Introduction and enables the  
49 analysis of time-series images of small plants in the field. This, in turn, paves a way to  
50 address biological questions which have been difficult otherwise. We modified the final part  
51 of the first and second paragraphs of Introduction to highlight the characteristics of our  
52 method (lines 81–83, 101–104). In the revised manuscript, the former reads ‘*Overcoming all*  
53 *these challenges and analyzing time-series images of different species in different*  
54 *environments further our understanding of the growth and environmental responses of*  
55 *plants.*’. The latter now reads ‘*The application of DNN to high-resolution image analysis of*  
56 *plants in the field while overcoming the challenges described in this and the previous*  
57 *paragraphs enables the identification of diverse biological questions, including ecology and*  
58 *evolution, with pigment accumulation in allopolyploids and their progenitors being one an*  
59 *example.*’ In addition, we articulated the challenges in field phenotyping in the middle of the  
60 same paragraph citing Champ et al. 2020 (Appl Plant Sci 8: 1-20) (line 93, reference #15).

61

62 I also have some concerns about relating leaf color to anthocyanin content. The  
63 authors inferred anthocyanin content, related to color, by estimating content and  
64 then dividing it by leaf area. However, many factors other than leaf area could be  
65 involved in an accurate estimate of anthocyanin content, and this is especially true  
66 when content is inferred from color. For example, leaf thickness and cell number are  
67 both important when actually putting content on a per-unit basis. Dry weight or  
68 fresh weight would have been better than area; also, because anthocyanins are  
69 typically located in the cell vacuole, cell number would be a good metric, but a per-  
70 cell estimate would be much more involved (requiring a relationship between cell  
71 number and leaf volume). I am therefore a bit concerned about putting the content  
72 on a per-area basis. When relating to color, I also have some concerns. Anthocyanins  
73 exist in leaves along with many other pigments, especially chlorophyll. That means  
74 that a given anthocyanin content might appear as pink, red, or green leaves,  
75 depending on the amount of chlorophyll also present in the leaves, which could vary  
76 depending on season, stress, etc., but is unknown. The impact of variation in other  
77 pigments and cuticle is also unknown. Thus, I am not sure that anthocyanin content  
78 is actually being measured; rather, the color is recorded, but the relationship to  
79 actual content seems unclear. A better metric would be color as an indicator of  
80 stress, induced experimentally. It would also be interesting to know if the same or  
81 different compounds are being produced, both among genotypes and species and  
82 over time. This might perhaps be a more interesting question than content.

83

84 Thank you for sharing your insights.

85

86 Upon your suggestion, we utilized available data and estimated not only anthocyanin per  
87 area, but also anthocyanin per fresh weight from color information. The results of leave-one-  
88 out-cross-validation indicate that the random forest model with  $L^*a^*b^*$  with anthocyanin per  
89 weight show higher correlation coefficient for measured and predicted values ( $R^2 = 0.64$ )  
90 compared with anthocyanin per area (Supplementary Fig. 7, 27, and 28). The linearity in the  
91 fitting plot, especially for the anthocyanin value range 0-50 (Fig. 4), shows the validity of

92 anthocyanin per weight. Unlike previous study on *Arabidopsis thaliana* in the laboratory  
93 which found a clear opposite trend between anthocyanin and chlorophyll along color gradient  
94 (Faragó et al. 2018 *Frontiers in Plant Science* 9:1–12, line 264, reference #48), anthocyanin  
95 and chlorophyll were only weakly associated in our dataset (Supplementary Fig. 11). The  
96 weak association despite a wide range of chlorophyll data points suggests that the influence  
97 of chlorophyll alone on anthocyanin is not great in our dataset possibly because other factors  
98 such as light and leaf wax are also influential in outdoor condition. This weak association  
99 suggests that the validity of our anthocyanin data would not be affected by chlorophyll.  
100 Given these, in the revised version of the manuscript, we adopted anthocyanin per weight.  
101 With anthocyanin per weight, we can capture the seasonal fluctuation of anthocyanin which  
102 is the main goal of the study. The higher accuracy of anthocyanin per weight in comparison  
103 to anthocyanin per area could be attributed to the size of the cells with anthocyanin: if the  
104 cells in layers beneath the surface layer are larger, they may accumulate more anthocyanin,  
105 leading to the anthocyanin content better estimated when weight based. Please note that most  
106 of our conclusions of the downstream analyses were not affected by changing the estimation  
107 from anthocyanin per area (Supplementary Fig. 12, 16, 18, 19, 21, 24, and 26) to that per  
108 weight (Fig. 5–7, Supplementary Fig. 17, 20, 23, and 25). We appreciate your precious  
109 suggestion to improve our estimation of the anthocyanin content.

110  
111 In addition to the anthocyanin contents, we performed PCA on a\* to examine the pattern of  
112 seasonal fluctuation of color (Supplementary Fig. 22). The result of a\* resembled those of the  
113 anthocyanin contents (Fig. 7 and Supplementary Fig. 19), suggesting that the evolutionary  
114 relationship implied by the similarity among the plants in this study is not an artifact of the  
115 anthocyanin estimation model.

116  
117 It is beyond the scope of this study to experimentally manipulate stress or quantify  
118 compounds, however, these would provide interesting further insights into the environmental  
119 response of the genotypes and species over time. The observed color change in indoor *A.*  
120 *halleri* in response to light and temperature suggests that such experiments are promising in  
121 studying compounds (Supplementary Fig. 31).

122  
123 I also felt that the treatment of anthocyanins in the polyploids and diploid parents  
124 was superficial. There is a large literature on anthocyanins and other flavonoids in  
125 polyploids and their progenitors, and this is not addressed. The current paper,  
126 though, with these very approximate estimates of content, does not actually  
127 contribute much to the very interesting issues raised over the past decades about the  
128 diversity of compounds that could be produced in an allopolyploid in particular,  
129 given the combination of pathways of its parents.

130  
131 Thank you for raising this point. As described in the Results (related to Fig. 6) and  
132 Discussion, our focus was on characterizing environmental response patterns among species  
133 and genotypes using anthocyanin as an indicator, rather than characterizing different pigment  
134 compounds and their pathways. Diversity in the molecular details and pathways of pigments,  
135 as well as diversity in the sensing mechanisms for environmental cues, may account for the  
136 observed diversity in anthocyanin fluctuation. These are beyond the scope of this study but  
137 highlighted by our results as future challenges (Discussion, lines 457–461).

138

139 Although this study was set up to address the diversity in seasonal fluctuation patterns of leaf  
140 anthocyanin from time-series data in the field, there is a common finding in this study and in  
141 the literatures on the diversity of pigments and colors of flowers in allopolyploids under  
142 controlled condition. Thus, we revised the Discussion by incorporating McCarthy et al. 2017  
143 (Am J Bot 104: 92–101) and McCarthy et al. 2015 (Ann Bot 115: 1117–1131) (references  
144 #62 and 63, lines 479–484). The corresponding part reads:

145

146 *The similarity of synthetic allopolyploids to a subset of natural counterparts that exhibit*  
147 *variation in a trait is consistent with the findings on the pigments (cyanidin, quercetin, and*  
148 *kaempferol) and color in Nicotiana flowers under controlled conditions<sup>62,63</sup>. Our time-series*  
149 *data suggest that synthetic polyploids can recapitulate the polyploid speciation that is*  
150 *observable in the fluctuation of anthocyanin content and leaf color in outdoor conditions.*

151

152 In addition, I think that all data and code should be publicly available, with nothing  
153 held back to be obtained from the authors upon request.

154

155 We deposit the data and scripts from this study in Supplementary Information or in the public  
156 repository Dryad. The details of the items in Dryad are stated in the Data availability and  
157 Code availability sections of the revised manuscript.

158

159 In sum, I find all aspects of the ms interesting, but I also think that each part would  
160 require work to meet the standards of the Nature family of journals. I also think that  
161 the anthocyanin portions of the paper require much more substantial work to be  
162 useful as verifiable and solid markers of stress and/or polyploidy.

163

164 We hope the revised manuscript provides a better framework and that the adoption of  
165 anthocyanin per weight enhances the quality of the study to meet the standards of the journal.

166

167 Reviewer #2 (Remarks to the Author):

168

169 This study reports on time-series planting phenotyping for detecting seasonal  
170 fluctuation in anthocyanin content in diploid and polyploid Arabidopsis. The authors  
171 detected automated hardware and software systems to collect images in the fields  
172 for this experimental study. And a large dataset was generated to cover three years  
173 and two sites in Japan and Switzerland. The time-series monitoring of anthocyanin  
174 content for the entire growing season in response to environmental changes is novel.  
175 It is important for answering biological questions. I have little knowledge about the  
176 biological processes and my concerns are mainly focused on the estimation of  
177 anthocyanin content from color information.

178

179 1.Figs. 4 & S6: the anthocyanin content (Anth) is usually expressed in ug/cm<sup>2</sup> and  
180 ranges from 0 to 40. The expression in this study is inappropriate. The term relative  
181 anthocyanin content per mm<sup>2</sup> is confusing. If it is expressed per leaf area, then it is  
182 not a relative value but an absolute value. Moreover, I suggest to use cm<sup>2</sup> instead of  
183 mm<sup>2</sup>, so that the digital numbers do not have to carry too many digits (E-4).

184



185 According to the comment by the Reviewer 1, we thoroughly revised this point.

186

187 In the revised version of the manuscript, we changed the unit to relative amount per leaf  
188 weight which improved the fitting of the values, and we used g as a unit in figures to make  
189 the range of the digits more visible. Please, refer to our comments to Reviewer 1 for the  
190 details of the adoption of anthocyanin per weight instead of anthocyanin per area.

191

192 As to anthocyanin per area, we adopted  $\text{cm}^2$  instead of  $\text{mm}^2$  in the figures to improve  
193 visibility. Besides, we display the amount for the entire sampled leaf area because the original  
194 version showed the amount for a half of the sampled leaf area by mistake.

195

196 In addition, as we measured the anthocyanin content by absorption spectrophotometry, the  
197 accurate conversion of absorbance to weight ( $\mu\text{g}$ ) is not possible due to the complexity of  
198 molecular species of anthocyanin. We retained the term relative following the description in a  
199 previous study (Neff and Chory 1998, Plant Physiology 118:27-36,  
200 <https://doi.org/10.1104/pp.118.1.27>.)

201

202 2.The data points in Fig. 4 were concentrated at the lower end and contributed more  
203 to the correlation coefficient than the points at the higher end. The r value might be  
204 a bit misleading and could not reflect the diversion of data points from the 1:1 line at  
205 the higher end. There should be a better way to measure the goodness of fit in this  
206 case. There were too many data points representing green leaves. Is it possible to  
207 build a random forest model for purple leaves specifically?

208

209 The adoption of anthocyanin per weight instead of per area resolved the diversion of the data  
210 points from the = 1:1 line and the concentration of data points corresponding to green leaves  
211 to a great extent (Fig. 4).

212

213 It is technically possible to split the dataset at an arbitrary color threshold and run a random  
214 forest model respectively. However, few data points showing large variation for red leaves  
215 are not apt for accurate estimation.

216

217 3.Line 239-240: underestimation is serious for high values ( $>0.015$ ) where the  
218 predicted values were all below the 1:1 line. This insensitivity to high Anth may cause  
219 problems for the leaves with high Anth. This may be a problem for purple leaves in  
220 the field. In the time series data of Fig. 5, the predicted values were all lower than  
221 0.0125 for the time-series phenotyping over three years and two sites. Was this true  
222 or caused by the color saturation at high Anth values? If it was caused color  
223 saturation, the predicted Anth for purple leaves might not be convincing.

224

225 As explained above, the diversion of the data points from the = 1:1 line generally improved  
226 by adopting anthocyanin per weight.

227

228 The deviation is conspicuous when the value of the estimated anthocyanin content is  $>50$ ,  
229 which is of extremely red leaves we included to avoid extrapolation in the time-series data  
230 analysis (Fig. 4). In our time-series data, the values of the estimated anthocyanin contents are

231 <50 (Fig. 5). Similarly, the values of  $L^*$ ,  $a^*$ , and  $b^*$  in our time-series are within the range of  
232 those in the dataset for pigment measurement ( $L^*$ : 11.99982-193.9581,  $a^*$ : 106.5-156.0156,  
233  $b^*$ : 91.625-178.1094). Given these, we consider that the influence of the deviation from the =  
234 1:1 line on the analysis of the time-series trend is limited and that we can capture the essential  
235 trends of the seasonal fluctuation of the anthocyanin content.

236  
237 Furthermore, the deviation is in such a manner that the anthocyanin content is underestimated  
238 for purple leaves. This leads to a conservative evaluation of the difference in the anthocyanin  
239 content between plants with large and small anthocyanin contents. As such, we could  
240 interpret the detected difference in anthocyanin content between species and genotypes with  
241 confidence.

242

243 4.Fig. S14: The LOO CV accuracy is low with a  $R^2$  of 0.45. Why was the accuracy in Fig.  
244 S6 much higher? Is it hard to believe such a model could work well for the time-  
245 series phenotyping project.

246

247 With anthocyanin content per weight,  $R^2$  from the LOO CV is 0.64. The difference in the  
248 accuracy between Fig. S14 (corresponding to Supplementary Fig. 28 in the revised  
249 manuscript, with corrected  $R^2$  value 0.44 as the original value was calculated for a subset of  
250 the data by mistake) and Fig. S6 (corresponding to Supplementary Fig. 10 in the revised  
251 manuscript) is due to that the former shows the result of cross validation whereas the latter  
252 shows that of fitting. With LOO CV we divided the data into subsets and repeated training  
253 and validation to obtain the result that shows how good the model is at predicting the  
254 anthocyanin content. With fitting we used all the data to determine the decision tree  
255 parameters of the model.

256

257 Even if each single estimation contains a certain noise, we consider that we can capture the  
258 essential trends of the seasonal fluctuation of the anthocyanin content with the current  
259 accuracy based on the average of multiple individual plants and adoption of a moving  
260 average which reduces noise (e.g., Smith 1997, The Scientist and Engineer's Guide to Digital  
261 Signal Processing Chapter 15, P279; Warner 2016, Optimizing the Display and Interpretation  
262 of Data, Chapter 3, P56) (references #82 and 83). In addition, the trend detected by using the  
263 model corresponds to the known phenomenon of *Arabidopsis* to turn reddish under low  
264 temperatures in winter, suggesting the model to be biologically reasonable.

265

266 5.Table S4: If the explanatory variables only included  $R+G+B$  and  $L^*+a^*+b^*$  for Anth  
267 estimation, more variables could be extracted from the RGB images. There are many  
268 studies on the extraction of color indices generated from two or three channels in  
269 the literature of remote sensing and plant phenotyping. Advanced methods for  
270 pigment estimation could be helpful for fixing the color saturation problem. This is  
271 the key to improved phenotyping for tracking the temporal variation in Anth in  
272 response to complex environmental conditions.

273

274 Thank you for your suggestion. Referring to the literature of remote sensing and plant  
275 phenotyping, we compared RMSE and  $R^2$  of LOO CV for different pigment estimation  
276 methods that were applicable to our data of leaf pigments measured at specific wave lengths  
277 with absorption spectrophotometry. Of the examined methods, i.e.,  $R+G+B$ ,  $L^*+a^*+b^*$ ,  
278  $Y+U+V$ ,  $H+S+V$ , Excess Red, Green Red Vegetation Index, and Red Green Ratio, it turned

279 out that a random forest model with  $L^*+a^*+b^*$  and the anthocyanin content per weight was  
280 the most accurate (Supplementary Fig. 6–7). Therefore, we adopted this model throughout  
281 the revised manuscript.

282

283 Reviewer #3 (Remarks to the Author):

284

285 This study highlights an inexpensive and suitable approach to phenotyping plant  
286 populations in natura; and uses it to address the consequences of hybrid  
287 allopolyploidy with an elegant design. The choice to address anthocyanin as a  
288 phenotype known to show high environmental plasticity is of great interest to  
289 address how the combination of two progenitor species in a third species interacts  
290 with environmental variation.

291 The study makes the best of Arabidopsis-relatives, including *A. thaliana* to validate  
292 findings as well as taxa of the polyploid complex in suitably replicated sites. The use  
293 of experimentally resynthesized polyploids and their comparison with naturally  
294 established ones is of particular fundamental interest.

295 It matches papers typically published in Nature Communications, offering a detailed  
296 description of a solid amount of data and analyses that may inspire follow-up studies  
297 relying on this methodology. It also brings our understanding of polyploid systems  
298 further, and will hopefully foster further use of experimental allopolyploids in an  
299 ecological context.

300

301 I noticed only one minor issue that I was unable to solve through the rich  
302 documentation: L. 515 about the experimental production of synthetic allopolyploids  
303 "RS7 was automatically polyploidized from a hybrid...", you mean "spontaneously"  
304 (i.e. without induction by colchicine). By the way, it may be good to spell their details  
305 out (are they S0?, aso)

306

307 Thank you for your suggestion. In the revised manuscript, we rephrased the polyploidization  
308 process as suggested (line 552) and provided the generation and other information about the  
309 synthetic allopolyploids (Methods, lines 554–557).

Reviewers' Comments:

Reviewer #1:

Remarks to the Author:

I appreciate the authors' efforts to revise the ms following the suggestions of the reviewers, where appropriate. I think the revisions have made for a much stronger ms, and I have no further substantive suggestions. I noted a few small editorial issues, but I assume that they will be corrected by the copy editor. Examples are: (1) line 463: 'in fields' should be 'in the field' and (2) line 815: 'was' should be 'were' ('data' is plural).

Reviewer #2:

Remarks to the Author:

I am grateful that the authors had made substantial revisions to improve the manuscript. The estimation of anthocyanin content from color information has been improved remarkably by changing the unit from area basis to fresh weight basis. I have no more comments.

1 **REVIEWERS' COMMENTS**

2  
3 Reviewer #1 (Remarks to the Author):

4  
5 I appreciate the authors' efforts to revise the ms following the suggestions of the  
6 reviewers, where appropriate. I think the revisions have made for a much stronger ms,  
7 and I have no further substantive suggestions. I noted a few small editorial issues, but I  
8 assume that they will be corrected by the copy editor. Examples are: (1) line 463: 'in  
9 fields' should be 'in the field' and (2) line 815: 'was' should be 'were' ('data' is plural).

10  
11 Thank you for your thorough review and comment.

12  
13 We corrected the expressions pointed out in (1) and (2) and reviewed and corrected other  
14 editorial issues in the manuscript.

15  
16 We highly appreciate your suggestions to improve the manuscript.

17  
18 Reviewer #2 (Remarks to the Author):

19  
20 I am grateful that the authors had made substantial revisions to improve the manuscript.  
21 The estimation of anthocyanin content from color information has been improved  
22 remarkably by changing the unit from area basis to fresh weight basis. I have no more  
23 comments.

24  
25 Thank you for your comment. We highly appreciate your suggestions to improve the  
26 manuscript.
